# Supplementary material for: Chromosomal aberrations and prognostic analysis of secondary acute myeloid leukemia—a retrospective study
Source: PeerJ. 2023 May 15;11:e15333. doi: 10.7717/peerj.15333 (PMC10194067; doi:10.7717/peerj.15333)
Supplement: Data S1 [file peerj-11-15333-s001.xlsx]

## Sheet: Sheet1
Serial number	Age	Gender	Diagnosis prior to AML	AML	Conversion to AML time point	Outcome(until July 20, 2020)	time	OS(Days)	Chromosome of S-AML	RBC（×10^12/L）	WBC（×10^9/L）	PLT （×10^9/L）	LYM（×10^9/L）	MO （×10^9/L）	NEUT（×10^9/L）	Hb (g/L)	hsCRP (mg/L)	LDH （U/L）
1	72	Male	MDS	M7	2019.08.01	death	2019.10.20	80	45,XY,add(3)(q29),del(5)(q23),add(12)(p15),-7.[20]	1.96	1.67	30	0.82	0.3	0.41	65	42.2	325
2	56	Female	MDS	M2	2019.07.01	death	2020.01.27	211	47,XX,+8.[20]	1.63	0.77	10	0.41	0.2	0.16	57	16.4	169
3	76	Male	MDS	M2	2016.05.29	death	2017.12.25	575	46,XY,-7,+marker.[10]	2.81	1.94	31	1.25	0.57	0.12	96	84	199
4	65	Female	MDS	M4	2018.11.27	survival	2020.07.20	600	48,XXX,del(20)(q13),+X,+marker.[8]/48,XX,del(20)(q13),+14,+marker.[3]	2.52	5.81	27	3.59	1.76	0.39	69	26.2	401
5	66	Female	MDS	AML（unclassified）	2018.11.22	death	2020.03.22	485	43-46,XX.-2,-3,?add(3)(q11),del(5)(q13q31),del(7)(q31),add(11)(p15),-15,-17,add(17)(p13),-18,add(19)(p13),add(22)(q13)+mar,inc[cp20].	2.4	3.28	47	1.08	0.58	1.59	69	65	274
6	62	Female	MDS	AML（unclassified）	2017.12.03	death	2018.01.28	55	46,XX[3]/46,XX,+der(8)del(q22),del(12)(p11),-2,-5,-7,-11,-17,+22,+marker*3[17]	1.83	3.28	15	0.53	0.81	1.91	61	187.1	71
7	65	Female	MDS	M2	2019.09.23	death	2020.01.10	108	46，XY，del（5）q（23），add（17）p（12），-9，,12，,20，marker×3.[5]	1.38	2.13	23	1.45	0.4	0.24	49	1.5	265
8	61	Male	MDS	AML（unclassified）	2016.03.09	loss to follow-up	2016.03.20(Date of last contact of patients lost to follow-up)	10	43,X,t(5;19)(q21;q13),7q+,-7,-12,-20,-Y,+marker.[7]/44,XY,5q-,7q+,-12,-18,-20,+marker1,+marker2.[13]	1.95	3.56	22	0.61	0.22	2.72	66	30.704	373
9	70	Male	MDS	AML（unclassified）	2016.09.12	death	2016.12.27	105	46,XY	2.93	1.48	36	0.9	0.03	0.55	95	0.3	97
10	61	Male	MDS	AML（unclassified）	2019.12.22	survival	2020.07.20	210	46,XY	2.02	1.85	14	1.28	0.24	0.32	66	0.8	124
11	77	Female	MDS	M2	2018.06.14	loss to follow-up	2019.01.14(Date of last contact of patients lost to follow-up)	213	46,XX	2.07	0.73	12	0.63	0.01	0.08	67	66.7	156
12	20	Female	MDS	M2	2017.12.11	loss to follow-up	2018.05.11(Date of last contact of patients lost to follow-up)	150	46,XX	1.78	0.3	3	0.27	0	0.03	52	81.1	-
13	66	Female	MDS	AML（unclassified）	2018.06	loss to follow-up	2018.08(Date of last contact of patients lost to follow-up)	60	46,XX	2.09	4.67	13	2.82	1.57	0.24	64	87.2	184
14	69	Male	MDS/MPN	M2	2018.07	loss to follow-up	2018.09(Date of last contact of patients lost to follow-up)	60	46,XY	2.23	11.13	25	1.74	0.03	9.35	71	17.4	220
15	64	Female	MDS	M2	2013.01.23	death	2013.09.07	226	46,XX	1.47	0.44	3	0.43	0.01	0	44	74.7	-
16	30	Female	gastric diffuse large B cell lymphom	M3	2016.12.22	survival	2020.07.20	1305	46,XX	3.94	6.69	269	2.19	0.37	3.89	121	10	173
17	46	Male	CML	AML（unclassified）	2017.11.11	death	2018.05.11	180	48,XY,inv(3)(q21q26),+8,t(9;22)(q34;q11),i(17)(q11),+der(22)t(9;22)(q34;q11)[20]	2.53	1.33	69	0.74	0.1	0.47	73	182.289	266
18	61	Male	CMML	M2	2018.03.21	death	2019.02.08	323	48,XY,20q-,+8,+13.[5]	2	0.33	17	0.3	0	0.02	49	30.12	1371
19	55	Female	PMF	M2	2018.05.14	death	2018.10.05	143	48,XX,t(1;?)(q21;?),+der(1)t(1;?)(p32;?),-6,-7,+14,+19,+r.[8]/48,XX,t(1;?)(q21;?),+der(1)t(1;?)(p32;?),-6,-7,+14,+19,+marker.[2]	1.66	5.51	5	0.14	0.19	5.18	51	35.8	172
20	61	Male	MDS（coexist with CLL）	AML（unclassified）	2018.02.03	death	2018.04.07	62	45,XY,-5,-9,+mar[7]/45,XY,del(5)(q15),-9,add(11)(q25)[4]/44,XY,add(5)(p15),del(5)(q15),del(7)(q11),der(12)del(12)(p12)add(12)(p12),-13,-19,-21,+mar[5]	1.95	3.3	10	0.82	0.42	2.05	54	28	130
21	66	Female	CMML	M4	2018.05.03	loss to follow-up	2019.03.28(Date of last contact of patients lost to follow-up)	328	46,XX	2.22	4.48	4	2.03	2.09	0.35	65	61	171
22	38	Male	PMF	M5	2013.1.3	loss to follow-up	2014.03.30(Date of last contact of patients lost to follow-up)	450	47,XY,5q-,+8.[15]	1.88	47.17	111	22.08	15.89	5.8	55	31	1406
23	72	Male	rectal cancer	M2	2013.07.16	survival	2020.07.20	2560	46,XY	2.5	2.06	245	0.47	0.53	1.06	76	-	65
24	67	Female	rectal cancer	AML（unclassified）	2019.11.27	death	2019.12.18	21	40-48 XX,add(1)(p36),add(2)(q37),del(5)(q15),add(12)(p13),-8,-9,-11,-22,+marker×3.inc.[cp15]	2.58	7.76	60	0.91	1.6	5.19	64	193.7	-
25	32	Male	CML	AML（unclassified）	2016.02.27	death	2016.11.24	270	46,XY,t(9;22)(q34;q11),t(2;12;15),(p13;q13;p11),+8.[20]	5.49	43.13	207	4.14	1.73	36.62	152	90.387	1078
26*	44	Male	CML	M2	2016.11.05	loss to follow-up	2016.11.10	5	46,XY,t(9;22)(q34;q11)[8]/46,XY,t(9;22)(q34;q11),ins(3;3)(q25;q21q25)[5]	2.2	2.66	79	0.72	0.04	1.85	64	57.931	280
